# Supplementary material
Source: publisher site journal article supplement (https://kjim.org/upload/media/kjim-2024-442-Supplementary-Table-2.pdf)
Supplement: Supplementary file 1 [file kjim-2024-442-Supplementary-Table-2.pdf]

**Supplementary Table 2. OR and 95% CI for global satisfaction scores  $\geq 80$  based on multivariable logistic regression analyses in the patients with remission or low disease activity of rheumatoid arthritis or with no or mild disease activity of systemic lupus erythematosus**

|                            | Adjusted OR (95% CI) |                    |
|----------------------------|----------------------|--------------------|
|                            | RA (n = 101)         | SLE (n = 92)       |
| Sex                        |                      |                    |
| Male                       | Reference            | Reference          |
| Female                     | 0.32 (0.09–1.13)     | 1.16 (0.09–13.84)  |
| Age at the survey (yr)     | 1.02 (0.94–1.10)     | 1.02 (0.95–1.09)   |
| Duration of education (yr) |                      |                    |
| $\leq 9$                   | Reference            | Reference          |
| 9–12                       | 3.36 (0.65–17.1)     | 3.84 (0.37–39.38)  |
| $\geq 12$                  | 1.87 (0.32–10.94)    | 8.48 (0.60–119.44) |
| Household monthly income   |                      |                    |
| < 300 (*10,000 won)        | Reference            | Reference          |
| 300–500 (*10,000 won)      | 9.16 (1.39–60.40)    | 0.53 (0.11–2.53)   |
| $\geq 500$ (*10,000 won)   | 9.33 (1.49–58.19)    | 1.11 (0.14–8.35)   |
| Current use of NSAIDs      |                      |                    |
| Yes                        | Reference            | Reference          |
| No                         | 0.31 (0.05–1.65)     | 8.65 (1.02–73.22)  |
| Current use of steroids    |                      |                    |
| Yes                        | Reference            | Reference          |
| No                         | 1.26 (0.37–4.22)     | 2.39 (0.48–11.80)  |
| Number of comorbidities    | 1.11 (0.57–2.15)     | 1.25 (0.57–2.74)   |

OR, odds ratio; CI, confidence interval; NSAIDs, non-steroidal anti-inflammatory drugs.
